# Supplementary material for: Structural and biochemical evaluation of bisubstrate inhibitors of protein arginine N-methyltransferases PRMT1 and CARM1 (PRMT4)
Source: Oxford University Press journal article supplement (doi:10.1042/bcj20190826), 2020-02-03
Supplement: bcj-2019-0826_supp.pdf [file bcj-2019-0826_supp.pdf]

## Supplementary Material

### Supplementary experimental data for compounds 5, 6, 8, 9 and 10

**5** - 1-(4-(((2*R*,3*S*,4*R*,5*R*)-5-(6-amino-9*H*-purin-9-yl)-3,4-dihydroxytetrahydro furan-2-yl)methyl)(3-aminopropyl)amino)butyl)guanidine hydrochloride:  $[\alpha]^{23}_D$  17.66;  $\nu_{\max}/\text{cm}^{-1}$  3317, 3167, 1683, 1051;  $^1\text{H NMR}$  (400 MHz,  $\text{D}_2\text{O}$ )  $\delta_{\text{H}}$ : 8.46 (s, 1H, Ad-*H*), 8.44 (s, 1H, Ad-*H*), 6.14 (d,  $J=4.0$  Hz, 1H, 1'-*H*), 4.79 (m, 1H, 2'-*H*), 4.44-4.52 (m, 2H, 3'-*H* and 4'-*H*), 3.73-3.79 (1H, m, 5'- $\text{CH}_a\text{H}_b$ ), 3.67 (dd,  $J=14.0, 1.6$ , 1H, 5'- $\text{CH}_a\text{H}_b$ ), 3.35 (t,  $J=8.1$ , 2H,  $\text{CH}_2$ ), 3.29 (t,  $J=8.3$ , 2H,  $\text{CH}_2$ ), 3.02-3.06 (m, 4H,  $\text{CH}_2$  and  $\text{CH}_2$ ), 2.08-2.15 (m, 2H,  $\text{CH}_2$ ), 1.71-1.73 (m, 2H,  $\text{CH}_2$ ), 1.52-1.54 (m, 2H,  $\text{CH}_2$ );  $^{13}\text{C NMR}$  (100 MHz,  $\text{D}_2\text{O}$ )  $\delta_{\text{C}}$ : 156.6, 150.1, 148.1, 144.7, 143.4, 119.1, 89.9, 78.0, 73.1, 71.5, 54.7, 53.0, 50.5, 40.4, 36.6, 24.9, 21.5, 20.2. HRMS (ESI+)  $m/z$ : ( $\text{M}+\text{H}^+$ ) calcd  $\text{C}_{18}\text{H}_{33}\text{N}_{10}\text{O}_3^+$  437.2737, found 437.2731.

**6** - 3-((4-((amino(iminio)methyl)amino)butyl)(((2*R*,3*S*,4*R*,5*R*)-5-(6-amino-9*H*-purin-9-yl)-3,4-dihydroxytetrahydrofuran-2-yl)methyl)amino)propan-1-aminium chloride  $[\alpha]^{23}_D$  +23.55 (c 1.0 in  $\text{H}_2\text{O}$ );  $\nu_{\max}/\text{cm}^{-1}$  3363, 1647, 1436, 1120.  $^1\text{H NMR}$  (400 MHz,  $\text{D}_2\text{O}$ )  $\delta_{\text{H}}$ : 8.42 (s, 1H, Ad-*H*), 8.40 (s, 1H, Ad-*H*), 6.12 (d,  $J=4.0$  Hz, 1H, 1'-*H*), 4.80-4.51 (m, 1H, 2'-*H*), 4.43-4.51 (m, 2H, 3'-*H* and 4'-*H*), 3.72-3.78 (1H, m, 5'- $\text{CH}_a\text{H}_b$ ), 3.66 (d,  $J=14.0$  Hz, 1H, 5'- $\text{CH}_a\text{H}_b$ ), 3.32 (t,  $J=7.8$ , 2H,  $\text{CH}_2$ ), 3.24 (t,  $J=7.9$ , 2H,  $\text{CH}_2$ ), 3.00-3.04 (m, 4H,  $\text{CH}_2$  and  $\text{CH}_2$ ), 2.08-2.15 (m, 2H,  $\text{CH}_2$ ), 1.65-1.75 (m, 2H,  $\text{CH}_2$ ), 1.40-1.45 (m, 2H,  $\text{CH}_2$ ), 1.24-1.28 (m, 2H,  $\text{CH}_2$ );  $^{13}\text{C NMR}$  (100 MHz,  $\text{D}_2\text{O}$ )  $\delta_{\text{C}}$ : 156.6, 150.7, 148.2, 145.7, 143.1, 119.2, 89.9, 78.0, 73.0, 71.6, 54.8, 53.3, 50.5, 40.8, 36.5, 27.3, 23.6, 22.8, 21.5. HRMS (ESI+)  $m/z$ : ( $\text{M}+\text{H}^+$ ) calcd  $\text{C}_{19}\text{H}_{35}\text{N}_{10}\text{O}_3^+$  451.2894, found 451.2901.

**8** - 3-(((2*R*,3*S*,4*R*,5*R*)-5-(6-amino-9*H*-purin-9-yl)-3,4-dihydroxytetrahydrofuran-2-yl)methyl)(3-(pyrimidin-2-ylamino)propyl)amino)propan-1-aminium chloride:  $[\alpha]^{23}_D$  +23.55 (c 1.0 in  $\text{H}_2\text{O}$ );  $\nu_{\max}/\text{cm}^{-1}$  3084, 1644, 1052;  $^1\text{H NMR}$  (400 MHz,  $\text{D}_2\text{O}$ )  $\delta_{\text{H}}$ : 8.09 (s, 1H, Ad-*H*), 8.01 (s, 1H, Ad-*H*), 7.87 (d,  $J=4.9$ , 2H, Ar-*H*), 6.31 (app. t,  $J=4.9$ , 1H, Ar-*H*), 5.85 (d,  $J=4.8$ , 1H, 1'-*H*), 4.66 (app. t,  $J=4.8$ , 1H, 2'-*H*), 4.22-4.23 (m, 1H, 3'-*H*), 4.15 (app. t,  $J=5.3$ , 1H, 4'-*H*), 3.01-3.06 (m, 1H,  $\text{CH}_a\text{H}_b$ ), 2.93-2.98 (m, 1H,  $\text{CH}_a\text{H}_b$ ), 2.95 (t,  $J=7.3$ , 2H,  $\text{CH}_2$ ), 2.81-2.87 (1H, m, 1H, 5'- $\text{CH}_a\text{H}_b$ ), 2.73 (d,  $J=14.4$ , 1H, 5'- $\text{CH}_a\text{H}_b$ ), 2.61-2.67 (m, 2H,  $\text{CH}_2$ ), 2.50-2.56 (m, 2H,  $\text{CH}_2$ ), 1.72-1.79 (m, 2H,  $\text{CH}_2$ ), 1.61-1.66 (m, 1H,  $\text{CH}_a\text{H}_b$ ), 1.52-1.58 (m, 1H,  $\text{CH}_a\text{H}_b$ );  $^{13}\text{C NMR}$  (100 MHz,  $\text{D}_2\text{O}$ )  $\delta_{\text{C}}$ : 160.4, 157.7, 155.1, 152.5, 148.4, 139.8, 118.6, 109.9, 87.9, 81.4, 72.9, 72.0, 55.4, 51.7, 51.5, 39.4, 38.5, 24.4, 23.8; HRMS (ESI+)  $m/z$ : ( $\text{M}+\text{H}^+$ ) calcd  $\text{C}_{20}\text{H}_{31}\text{N}_{10}\text{O}_3^+$  459.2581, found 459.2575.

**9** - 3-(((2*R*,3*S*,4*R*,5*R*)-5-(6-amino-9*H*-purin-9-yl)-3,4-dihydroxytetrahydrofuran-2-yl)methyl)(3-(pyridin-2-ylamino)propyl)amino)propan-1-aminium chloride:  $[\alpha]^{23}_D$  +7.40 (c 1.0 in  $\text{H}_2\text{O}$ );  $\nu_{\max}/\text{cm}^{-1}$  3475, 3009, 1465, 1016;  $^1\text{H NMR}$  (400 MHz,  $\text{D}_2\text{O}$ )  $\delta_{\text{H}}$ : 8.40 (s, 1H, Ar-*H*), 7.71-7.76 (m, 1H, Ar-*H*), 7.61 (d,  $J=6.5$ , 1H, Ar-*H*), 6.83-6.86 (m, 1H, Ar-*H*), 6.75 (app t,  $J=6.5$ , 1H, Ar-*H*), 6.05 (d,  $J=3.6$ , 1H, 1'-*H*), 4.61 (app t,  $J=3.6$ , 1H, 2'-*H*), 4.43-4.44 (m, 2H, CH and  $\text{CH}_a\text{H}_b$ ), 3.80-3.82 (m, 1H, CH), 3.68 (d  $J=14.3$ , 1H,  $\text{CH}_a\text{H}_b$ ), 3.63 (1H, td,  $J=6.1, 2.6$ , CH) 3.35-3.42 (m, 4H, and  $2\times\text{CH}_2$ ), 3.00-3.12 (m, 3H,  $\text{CH}_2$  and  $\text{CH}_a\text{CH}_b$ ), 2.00-2.13 (m, 4H,  $2\times\text{CH}_2$ );  $^{13}\text{C NMR}$  (100 MHz,  $\text{D}_2\text{O}$ )  $\delta_{\text{C}}$ : 152.3, 149.8, 147.8, 144.5, 143.8, 143.2, 134.8, 119.1, 112.7, 90.3, 77.5, 73.2, 71.4, 58.9, 51.10, 51.07, 48.9, 38.6, 36.4, 21.8, 21.3; HRMS (ESI+)  $m/z$ : ( $\text{M}+\text{H}^+$ ) calcd  $\text{C}_{21}\text{H}_{31}\text{N}_9\text{O}_3^+$  458.2623, found 458.2623.

**10** (S)-4-(((2*R*,3*S*,4*R*,5*R*)-5-(6-amino-9*H*-purin-9-yl)-3,4-dihydroxytetrahydrofuran-2-yl)methyl)(3-(pyridin-2-ylamino)propyl)amino)-2-ammoniobutanoate, chloride salt:  $[\alpha]^{23}_D$  +20.73 (c 1.0 in  $\text{H}_2\text{O}$ );  $\nu_{\max}/\text{cm}^{-1}$  3441 (N-*H*), 3007, 1623, 1240, 1015;  $^1\text{H NMR}$  (400 MHz,  $\text{D}_2\text{O}$ )  $\delta_{\text{H}}$ : 8.43 (s, 1H, adenosine-*H*), 8.39 (s, 1H, adenosine-*H*), 7.75-7.79 (m, 1H, Pyr*H*), 7.65 (d,  $J=6.2$ , 1H, Pyr*H*), 6.88 (d,  $J=8.5$ , 1H, Pyr*H*), 6.76-6.80 (m, 1H, Pyr*H*), 6.09 (d,  $J=3.6$ , 1H, 1'-*H*), 4.64-4.66 (m, 1H, 2'-*H*), 4.42-4.45 (m, 2H, CH,  $\text{CH}_a\text{H}_b$ ), 4.08-4.14 (m, 1H, CH), 3.82-3.90 (m, 1H, CH), 3.72 (d,  $J=13.6$ , 1H,  $\text{CH}_a\text{H}_b$ ), 3.29-3.63 (m, 6H,  $\text{CH}_2$ ), 2.38-2.48 (m, 1H,  $\text{CH}_a\text{CH}_b\text{CH}$ ), 2.26-2.33 (m, 1H,  $\text{CH}_a\text{CH}_b$ ), 2.02-2.09 (m, 2H,  $\text{CH}_2\text{CH}_2\text{CH}_2$ );  $^{13}\text{C NMR}$  (100 MHz,  $\text{D}_2\text{O}$ )  $\delta_{\text{C}}$ : 170.4, 152.2, 149.7, 147.8, 144.4, 143.8, 143.2, 134.8, 119.1, 112.7, 90.3, 78.0, 73.1, 71.4, 54.7, 51.1, 50.9, 50.8, 50.5, 38.6, 24.1, 21.9; HRMS (ESI+)  $m/z$ : ( $\text{M}+\text{H}^+$ ) calcd  $\text{C}_{22}\text{H}_{31}\text{N}_9\text{O}_5^+$  502.2520, found 502.2521.

### Supplementary Tables

| Inhibitor               | [CARM1]/mg/mL | Crystallisation condition                                                      |
|-------------------------|---------------|--------------------------------------------------------------------------------|
| <b>4</b>                | 1.7           | 0.1 M Bis-tris propane pH 7.0, 0.02 M sodium phosphate, 21 % (w/v) PEG 3350    |
| <b>5</b>                | 1.7           | 0.1 M Bis-tris propane pH 7.0, 0.02 M potassium phosphate, 22 % (w/v) PEG 3350 |
| <b>6</b>                | 1.7           | 0.1 M Bis-tris propane pH 7.0, 0.2 M sodium acetate, 24 % (w/v) PEG 3350       |
| <b>7</b>                | 1.2           | 0.1 M Bis-tris propane pH 7.0, 0.2 M sodium acetate, 20 % (w/v) PEG 3350       |
| <b>8</b>                | 1.0           | 0.1 M Bis-tris propane pH 7.0, 0.02 M sodium phosphate, 22 % (w/v) PEG 3350    |
| <b>9</b>                | 3.0           | 0.1 M Bis-tris propane pH 8.5, 0.2 M sodium formate, 20 % (w/v) PEG 3350       |
| <b>10</b>               | 3.0           | 0.1 M Bis-tris propane pH 8.5, 0.2 M sodium formate, 20 % (w/v) PEG 3350       |
| <b>10 w/CARM1 N265Y</b> | 2.4           | 0.1 M Bis-tris propane pH 7.0, 0.02 M sodium phosphate, 26 % (w/v) PEG 3350    |

**Table S1. Crystallisation conditions for CARM1-inhibitor complexes.**

The protein concentrations indicated are the concentrations measured prior to addition of a half-volume of 500  $\mu$ M ligand solution, then mixing with the well solution, as detailed in the main text.

|                                          | 4                             | 5                             | 6                             | 7                             | 8                           | 9                             | 10                            | 10 (CARM1<br>N265Y)           |
|------------------------------------------|-------------------------------|-------------------------------|-------------------------------|-------------------------------|-----------------------------|-------------------------------|-------------------------------|-------------------------------|
| <b>PDB Code</b>                          | 6S7C                          | 6S7B                          | 6S70                          | 6S71                          | 6S74                        | 6S7A                          | 6S79                          | 6S77                          |
| <b>Beamline</b>                          | ID30B (ESRF) <sup>1</sup>     | I02 (DLS) <sup>2</sup>        | ID30B (ESRF)                  | ID30B (ESRF)                  | ID30B (ESRF)                | I03 (DLS)                     | I03 (DLS)                     | ID30-A1 (ESRF)                |
| <b>Wavelength (Å)</b>                    | 0.9762                        | 0.9795                        | 0.9762                        | 0.9762                        | 0.9762                      | 0.9762                        | 0.9762                        | 0.9800                        |
| <b>Resolution range</b>                  | 51.86 - 2.30<br>(2.38 - 2.30) | 61.12 - 2.66<br>(2.75 - 2.66) | 57.23 - 2.30<br>(2.38 - 2.30) | 88.99 - 2.06<br>(2.14 - 2.06) | 48.17 - 2.1<br>(2.18 - 2.1) | 71.42 - 1.86<br>(1.93 - 1.86) | 69.48 - 2.10<br>(2.18 - 2.10) | 48.01 - 2.12<br>(2.20 - 2.12) |
| <b>Space group</b>                       | P 21 21 2                     | P 21 21 2                     | P 21 21 2                     | P 21 21 2                     | P 21 21 2                   | P 21 21 2                     | P 21 21 2                     | P 21 21 2                     |
| <b>Unit cell a (Å)</b>                   | 74.697                        | 75.455                        | 74.684                        | 74.72                         | 75.393                      | 74.784                        | 75.479                        | 74.988                        |
| <b>b (Å)</b>                             | 98.629                        | 99.367                        | 98.677                        | 98.63                         | 99.029                      | 98.624                        | 99.196                        | 98.718                        |
| <b>c (Å)</b>                             | 207.438                       | 208.463                       | 207.1                         | 206.36                        | 207.952                     | 207.137                       | 208.439                       | 207.071                       |
| <b>Total reflections</b>                 | 279649 (18740)                | 294369 (2801)                 | 276271 (17387)                | 342936 (15243)                | 302969 (16836)              | 852511 (33682)                | 612585 (30578)                | 350341 (18242)                |
| <b>Unique reflections</b>                | 66343 (4477)                  | 45903 (437)                   | 66028 (4361)                  | 91634 (4501)                  | 80206 (4644)                | 129298 (6329)                 | 92162 (4483)                  | 87715 (4472)                  |
| <b>Multiplicity</b>                      | 4.2 (4.2)                     | 6.4 (6.4)                     | 4.2 (4.0)                     | 3.7 (3.4)                     | 3.8 (3.6)                   | 6.6 (5.3)                     | 6.6 (6.8)                     | 4.0 (4.1)                     |
| <b>Completeness (%)</b>                  | 96.7 (98.2)                   | 99.9 (98.0)                   | 96.2 (95.8)                   | 96.7 (96.5)                   | 87.8 (90.1)                 | 100.0 (100.0)                 | 100.0 (99.9)                  | 99.7 (99.8)                   |
| <b>Mean I/sigma(I)</b>                   | 11.8 (2.2)                    | 10.1 (2.8)                    | 13.8 (2.4)                    | 11.8 (2.1)                    | 11.6 (2.2)                  | 9.1 (0.8)                     | 7.4 (0.9)                     | 8.8 (1.2)                     |
| <b>R-merge</b>                           | 0.075 (0.741)                 | 0.210 (1.052)                 | 0.065 (0.546)                 | 0.058 (0.538)                 | 0.064 (0.496)               | 0.095 (1.829)                 | 0.186 (2.516)                 | 0.096 (1.176)                 |
| <b>R-pim</b>                             | 0.041 (0.412)                 | 0.090 (0.450)                 | 0.044 (0.295)                 | 0.033 (0.325)                 | 0.034 (0.269)               | 0.040 (0.876)                 | 0.078 (1.040)                 | 0.054 (0.655)                 |
| <b>CC<sub>1/2</sub></b>                  | 0.998 (0.684)                 | 0.994 (0.781)                 | 0.999 (0.765)                 | 0.999 (0.780)                 | 0.999 (0.818)               | 0.998 (0.393)                 | 0.996 (0.287)                 | 0.998 (0.431)                 |
| <b>Refinement</b>                        |                               |                               |                               |                               |                             |                               |                               |                               |
| <b>No of reflections</b>                 | 66203 (6645)                  | 45808 (4499)                  | 65966 (6428)                  | 91546 (9039)                  | 80113 (8094)                | 129154 (12752)                | 92043 (9068)                  | 87609 (8680)                  |
| <b>R-work</b>                            | 0.2068 (0.3141)               | 0.1945 (0.3060)               | 0.1851 (0.2571)               | 0.2336 (0.3088)               | 0.1921 (0.2845)             | 0.1993 (0.3201)               | 0.1989 (0.3268)               | 0.2039 (0.3111)               |
| <b>R-free</b>                            | 0.2355 (0.3306)               | 0.2278 (0.3406)               | 0.2129 (0.2893)               | 0.2542 (0.3531)               | 0.2151 (0.3084)             | 0.2194 (0.3504)               | 0.2314 (0.3406)               | 0.2464 (0.3230)               |
| <b>&lt;B-factors&gt; (Å<sup>2</sup>)</b> |                               |                               |                               |                               |                             |                               |                               |                               |
| <b>Protein</b>                           | 45.09                         | 41.05                         | 42.47                         | 42.01                         | 35.46                       | 45.96                         | 45.82                         | 42.68                         |
| <b>Inhibitors</b>                        | 50.40                         | 53.48                         | 49.10                         | 57.64                         | 35.74                       | 48.13                         | 47.71                         | 42.39                         |
| <b>RMS bond lengths (Å)</b>              | 0.016                         | 0.016                         | 0.020                         | 0.012                         | 0.018                       | 0.015                         | 0.032                         | 0.013                         |
| <b>RMS bond angles (°)</b>               | 1.76                          | 1.72                          | 1.73                          | 1.52                          | 1.51                        | 1.66                          | 2.07                          | 1.62                          |

**Table S2. Data collection and refinement statistics for CARM1-inhibitor crystal structures.** Statistics for the highest-resolution shell are given in parentheses.

| <b>PRMT1</b> |                     |                                                           |                       |                                           |
|--------------|---------------------|-----------------------------------------------------------|-----------------------|-------------------------------------------|
| Inhibitor    | $\Delta G$ (kJ/mol) | $\Delta H \pm$ standard error from curve fitting (kJ/mol) | $-T\Delta S$ (kJ/mol) | $N \pm$ standard error from curve fitting |
| <b>SAH</b>   | -35.1               | $-97.7 \pm 1.4$                                           | 62.6                  | $0.485 \pm 0.0037$                        |
| <b>4</b>     | -28.5               | $-67 \pm 3.22$                                            | 38.5                  | $0.519 \pm 0.0082$                        |
| <b>5</b>     | -30.8               | $-48.1 \pm 1.86$                                          | 17.2                  | $0.549 \pm 0.0092$                        |
| <b>6</b>     | -28.6               | $-41.5 \pm 2.79$                                          | 12.9                  | $0.607 \pm 0.019$                         |
| <b>7</b>     | -25.7               | $-27.5 \pm 1.4$                                           | 1.84                  | N/A <sup>1</sup>                          |
| <b>8</b>     | -28.5               | $-43.2 \pm 10.5$                                          | 14.7                  | $0.322 \pm 0.028$                         |
| <b>9</b>     | -27.5               | $-29.4 \pm 1.16$                                          | 39.1                  | $0.716 \pm 0.012$                         |
| <b>10</b>    | -24.9               | $-6.71^2$                                                 | -18.2                 | N/A <sup>2</sup>                          |

  

| <b>CARM1</b> |                     |                                                           |                       |                                           |
|--------------|---------------------|-----------------------------------------------------------|-----------------------|-------------------------------------------|
| Inhibitor    | $\Delta G$ (kJ/mol) | $\Delta H \pm$ standard error from curve fitting (kJ/mol) | $-T\Delta S$ (kJ/mol) | $N \pm$ standard error from curve fitting |
| <b>SAH</b>   | -34.9               | $-147 \pm 4.62$                                           | 113                   | $0.549 \pm 0.0086$                        |
| <b>4</b>     | -31.3               | $-103 \pm 2.65$                                           | 71.9                  | $0.481 \pm 0.0062$                        |
| <b>5</b>     | -29.4               | $-110 \pm 2.98$                                           | 80.5                  | $0.501 \pm 0.0060$                        |
| <b>6</b>     | -28.6               | $-79.2 \pm 6.42$                                          | 50.5                  | $0.417 \pm 0.012$                         |
| <b>7</b>     | -25.2               | $-77.7 \pm 9.65$                                          | 52.5                  | $0.648 \pm 0.032$                         |
| <b>8</b>     | -32.2               | $-124 \pm 1.86$                                           | 92.2                  | $0.529 \pm 0.0042$                        |
| <b>9</b>     | -34                 | $-86.2 \pm 7.42$                                          | 52.3                  | $0.529 \pm 0.025$                         |
| <b>10</b>    | -34                 | $-73.1 \pm 1.92$                                          | 39.1                  | $0.536 \pm 0.0079$                        |

<sup>1</sup> The stoichiometry was fixed to 0.5 due to a low c-value curve.

<sup>2</sup> Data were determined using a competition experiment, therefore the  $\Delta H$  error and binding stoichiometry are not calculated.

**Table S3. Thermodynamic parameters from ITC data for inhibitors 4, 5, 6, 7, 8, 9 and 10 titrations into PRMT1 and CARM1.**

$\Delta G$ ,  $\Delta H$ ,  $-T\Delta S$  and stoichiometry ( $N$ ) determined from titrations of SAH and inhibitors **4, 5, 6, 7, 8, 9**, and **10** into PRMT1 (top) or CARM1 (bottom). Standard errors are not calculated for  $\Delta G$  and  $-T\Delta S$  since they are calculated indirectly using the best-fit values of  $K_d$  and  $\Delta H$ .

|              |            | <b>CARM1</b>           |                                           |                          |                           |
|--------------|------------|------------------------|-------------------------------------------|--------------------------|---------------------------|
|              | Inhibitor  | $\Delta G$<br>(kJ/mol) | $\Delta H \pm$ standard error<br>(kJ/mol) | $-T\Delta S$<br>(kJ/mol) | $N \pm$ standard<br>error |
| <b>N161E</b> | <b>SAH</b> | -39.3                  | $-125 \pm 1.84$                           | 86.1                     | $0.692 \pm 0.0047$        |
|              | <b>8</b>   | -34                    | $-113 \pm 3.79$                           | 79.2                     | $0.745 \pm 0.012$         |
|              | <b>9</b>   | -36.8                  | $-86.7 \pm 1.17$                          | 49.9                     | $0.914 \pm 0.005$         |
|              | <b>10</b>  | -38.5                  | $-94.1 \pm 0.971$                         | 55.6                     | $1.02 \pm 0.004$          |
| <b>N265Y</b> | <b>SAH</b> | -33.3                  | $-99.1 \pm 1.05$                          | 65.9                     | $0.737 \pm 0.004$         |
|              | <b>8</b>   | -30.2                  | $-62.8 \pm 8.41$                          | 32.7                     | $0.698 \pm 0.051$         |
|              | <b>9</b>   | -31.3                  | $-61.9 \pm 3.36$                          | 30.6                     | $1.07 \pm 0.035$          |
|              | <b>10</b>  | <sup>1</sup>           | -                                         | -                        | -                         |

<sup>1</sup> The low sigmoidicity of the CARM1-N265Y/**10** curve was not sufficient for reliable determination of binding parameters.

**Table S4. Thermodynamic parameters from SAH and inhibitors 8, 9, and 10 titrations into CARM1 N161E and N265Y mutants.**

$\Delta G$ ,  $\Delta H$ ,  $-T\Delta S$  values derived from ITC data of SAH and inhibitors **8**, **9**, and **10** into CARM1 N161E and N265Y mutants are shown. Standard errors are not calculated for  $\Delta G$  and  $-T\Delta S$  since they are calculated indirectly using the best-fit values of  $K_d$  and  $\Delta H$ .

## Supplementary Figures

(a)

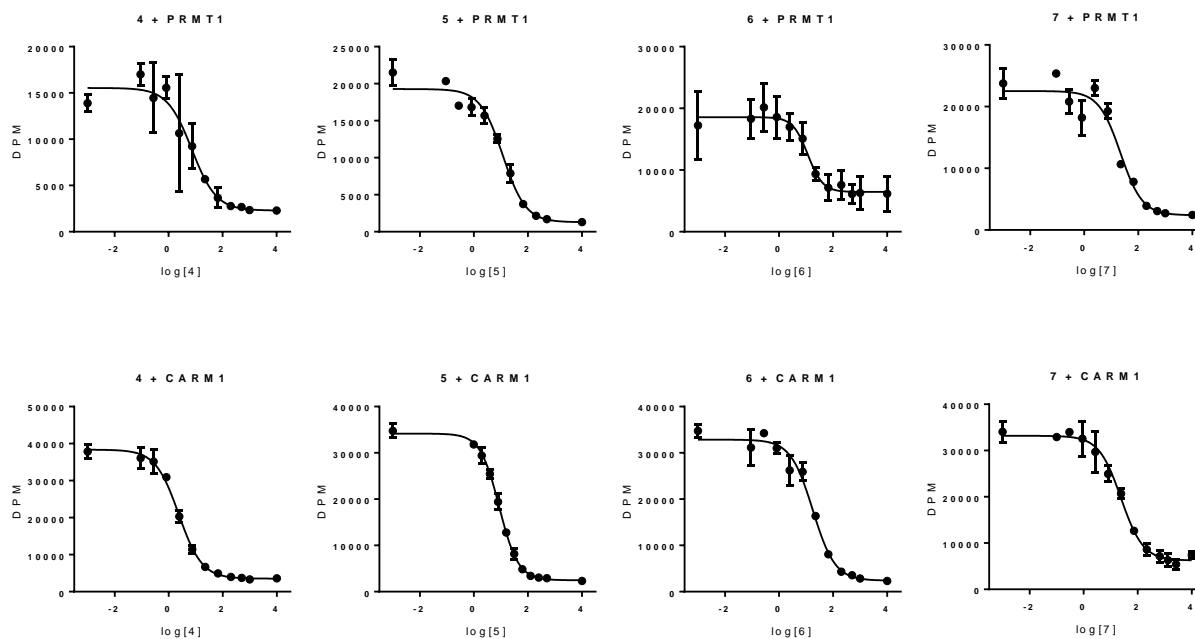

(b)

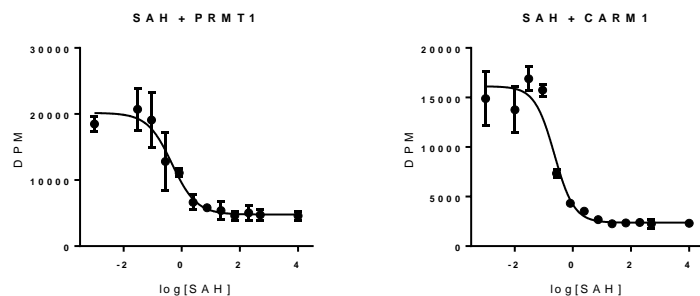

### Supplementary Figure S1. Dose-response curves for inhibitors 4, 5, 6, and 7 and SAH.

(a)  $IC_{50}$  curves for inhibitors 4, 5 and 6 and 7 with PRMT1 and CARM1. Error bars indicate standard deviation (S.D.) at each inhibitor concentration ( $n=2$ ). DPM is the un-normalised disintegrations per minute, measured by liquid scintillation counting, and is proportional to tritium incorporation into the substrate.

(b)  $IC_{50}$  curves for SAH with PRMT1 and CARM1. Error bars indicate S.D. at each inhibitor concentration ( $n=2$ ). DPM is the un-normalised disintegrations per minute, measured by liquid scintillation counting, and is proportional to tritium incorporation into the substrate.

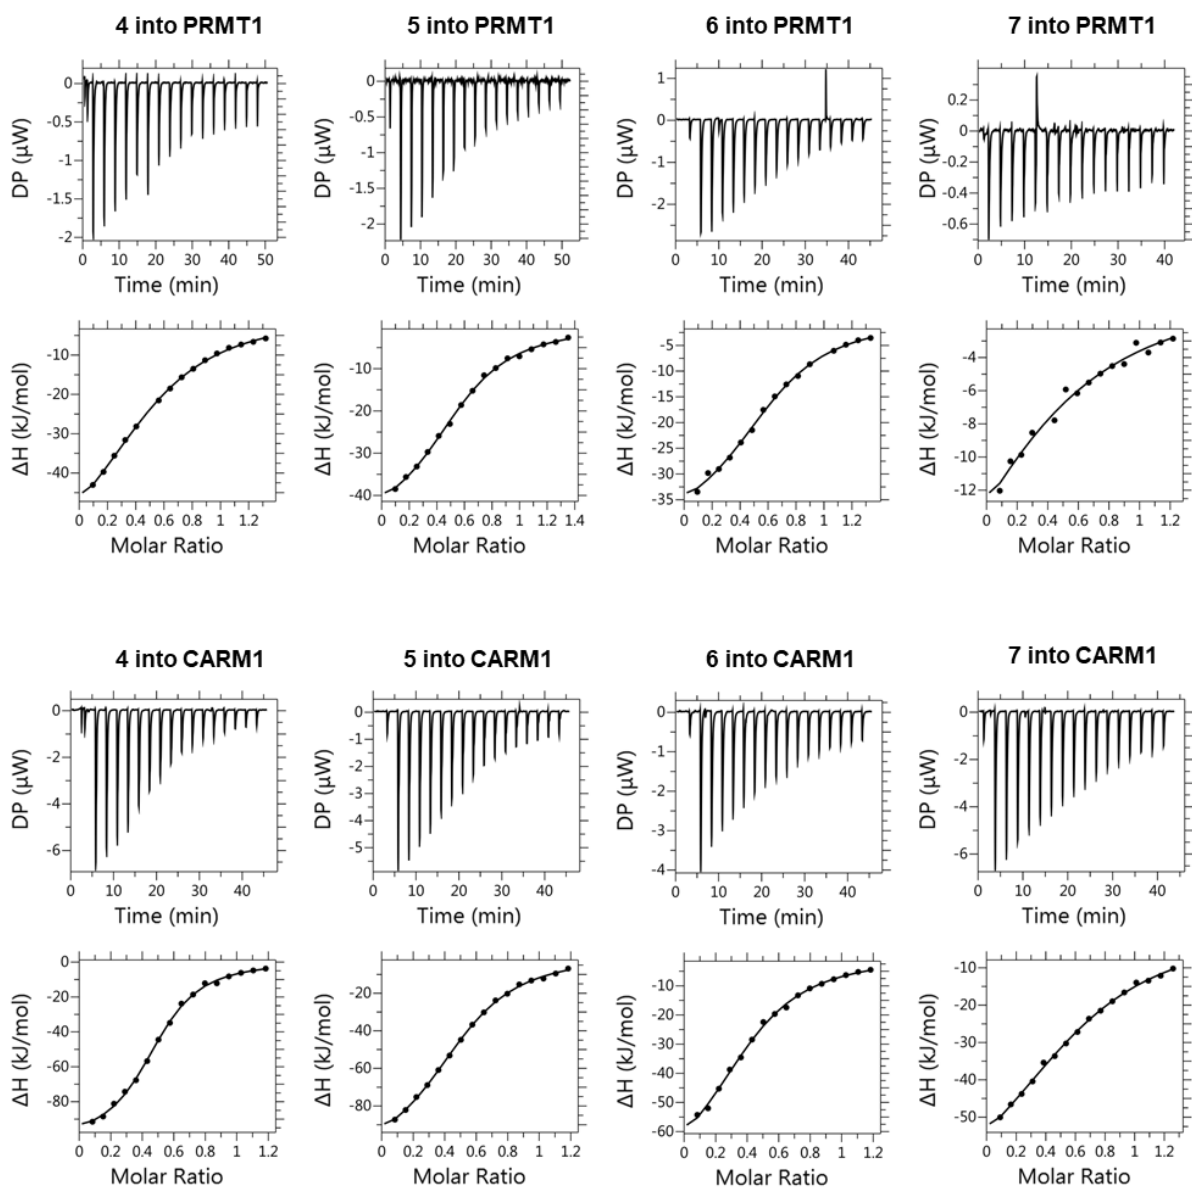

**Supplementary Figure S2. ITC thermograms (upper panels) and integrated heat plots (lower panels) for inhibitors 4, 5, 6 and 7.**

The inhibitor and PRMT used for each titration are given above the relevant graphs. CARM1 and PRMT1 titrations were conducted at 25°C with PRMT concentrations in the range of 42 – 121 μM and inhibitor concentrations in the range of 230 – 736 μM.

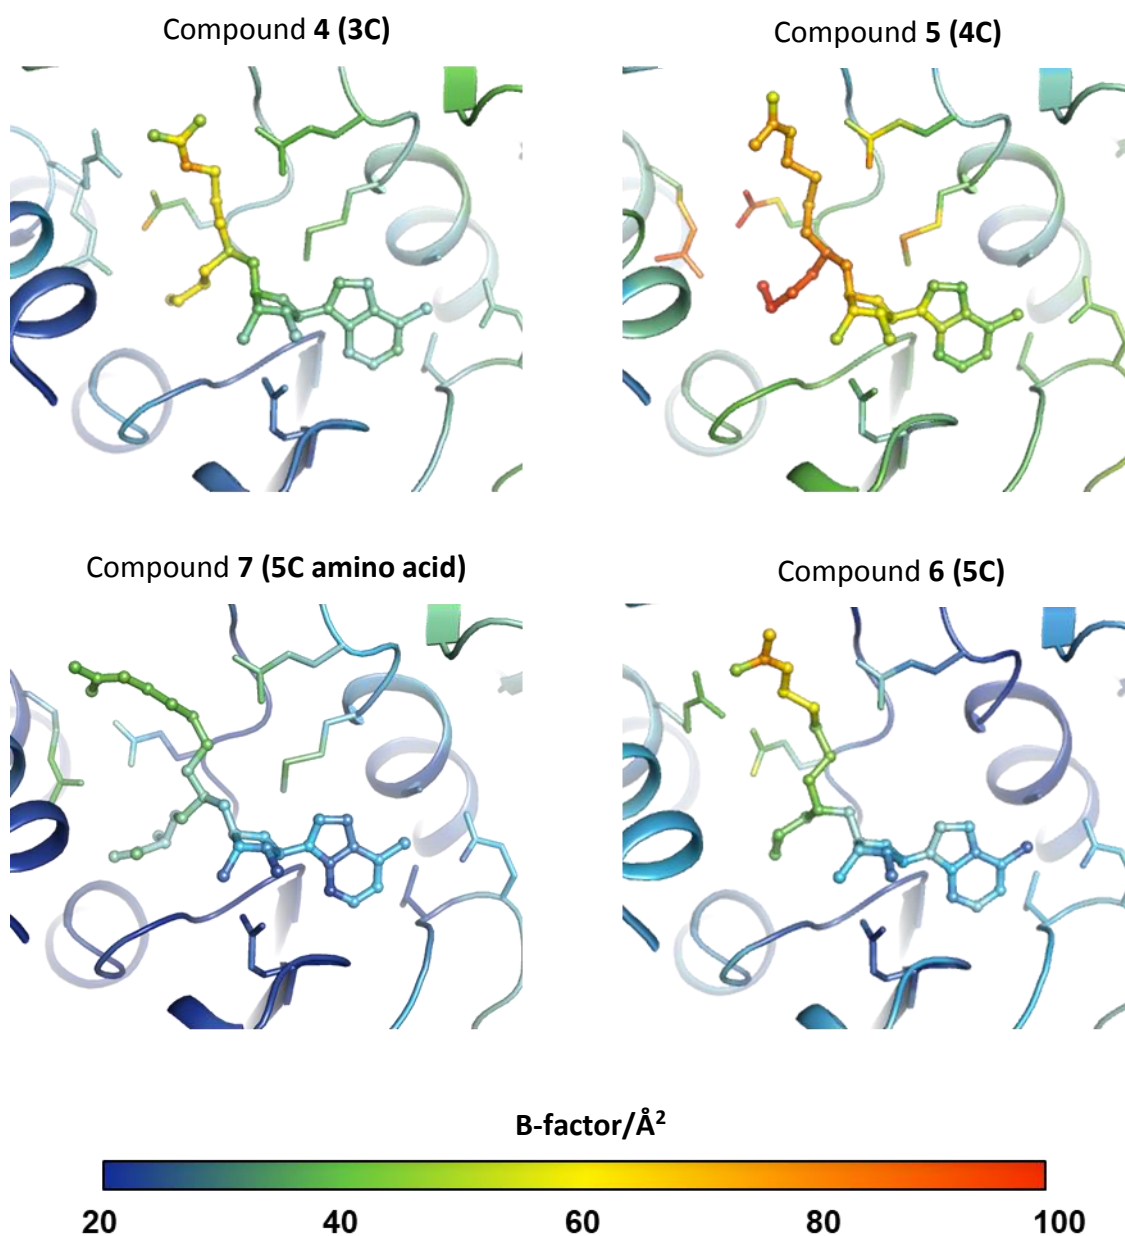

**Supplementary Figure S3. Graphical representation of B-factors in respective inhibitor 4, 5, 6 and 7 – CARM1 complex crystal structures.**

The structures in cartoon representation with the inhibitors shown in ball-and-stick are coloured according to B-factor values as shown in the spectrum bar below ranging from dark blue ( $20 \text{ \AA}^2$ ) to red ( $100 \text{ \AA}^2$ ).



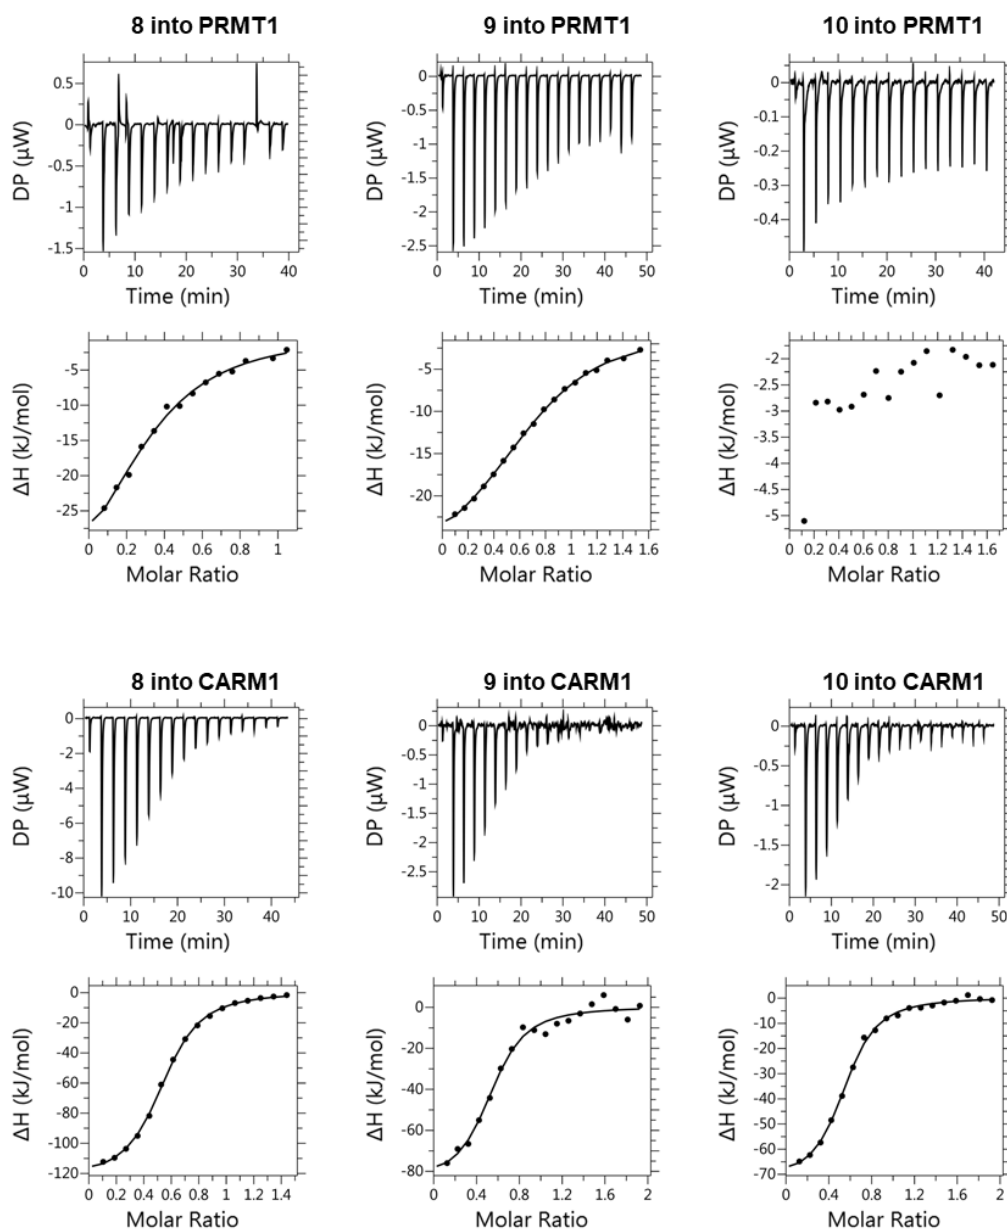

**Supplementary Figure S4. ITC thermograms (upper panels) and integrated heat plots (lower panels) for inhibitors 8, 9 and 10.**

The inhibitor and PRMT used for each titration are given above the relevant graphs. CARM1 and PRMT1 titrations were conducted at 25°C with PRMT concentrations in the range of 21 – 80  $\mu\text{M}$  and inhibitor concentrations in the range of 210 – 600  $\mu\text{M}$  in order to optimise sigmoidicity.

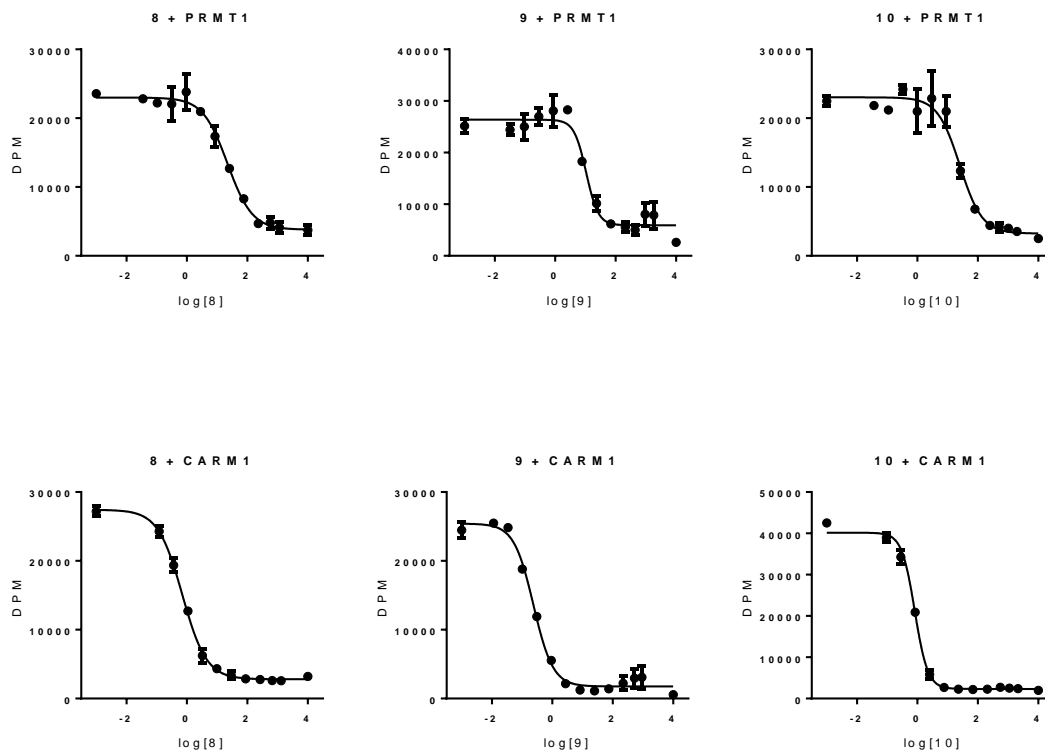

**Supplementary Figure S5. Dose-response curves for inhibitors 8, 9 and 10.**

IC<sub>50</sub> curves for inhibitors **8**, **9** and **10** with PRMT1 and CARM1. Error bars indicate the S.D. (n=2) at each inhibitor concentration. D.P.M. is the un-normalised disintegrations per minute, measured by liquid scintillation counting, and is proportional to tritium incorporation into the substrate.

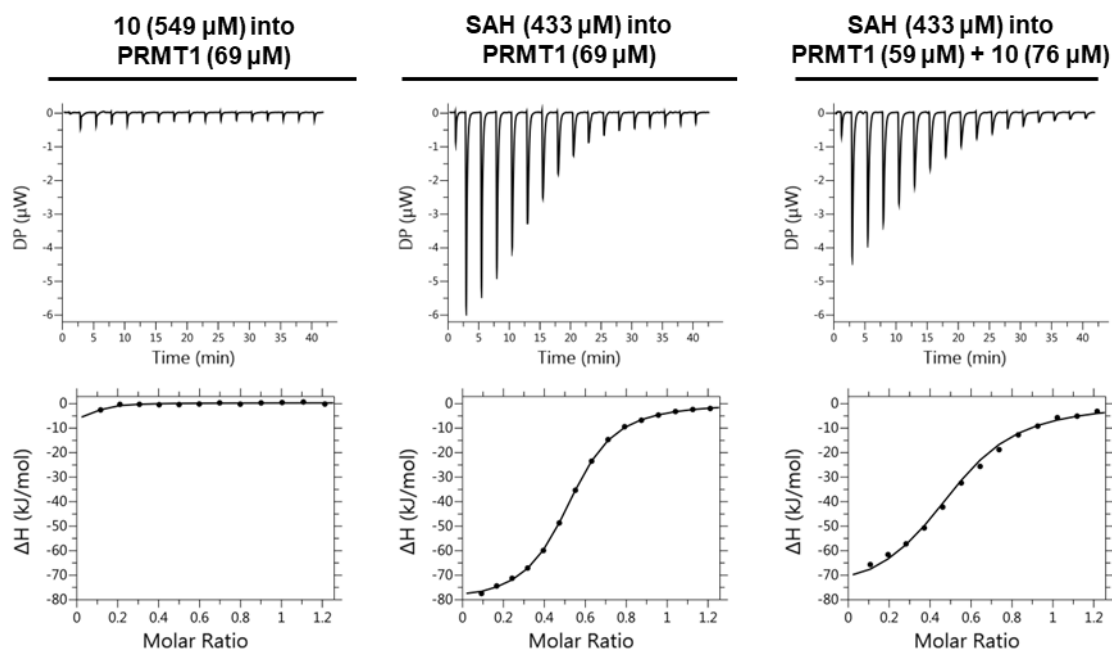

**Supplementary Figure S6. ITC experiments with PRMT1 and inhibitor 10 or SAH.**

ITC thermograms (upper panels) and integrated heat plots (lower panels) for titrations of SAH into PRMT in the presence and absence of inhibitor **10** (i.e. competition ITC experiment) are shown with the respective titrant(s) indicated above the thermograms.

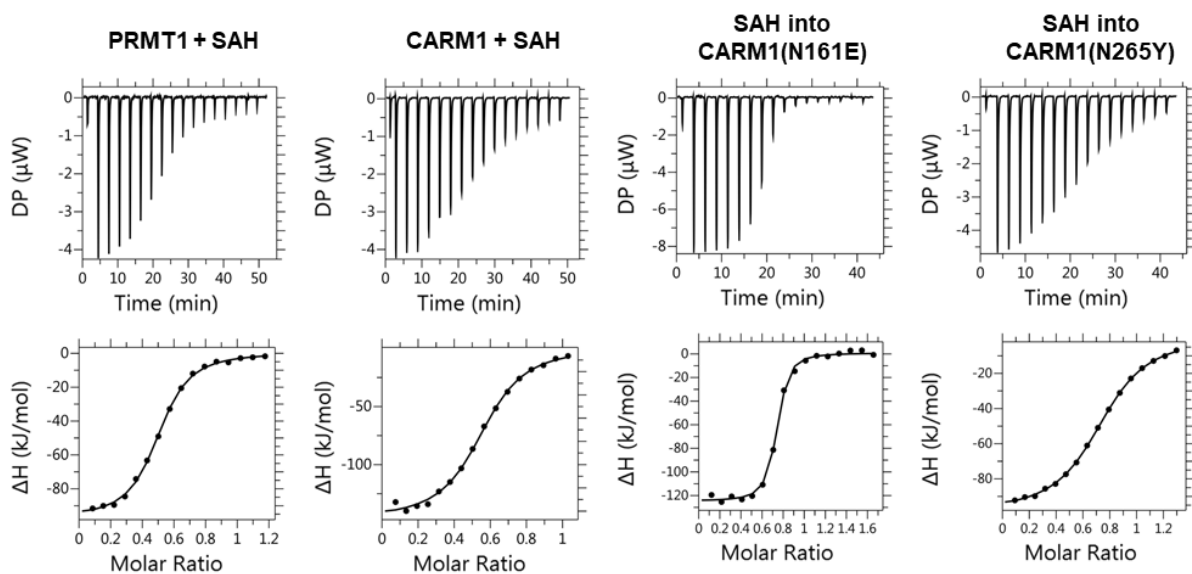

**Supplementary Figure S7. ITC data for CARM1 mutants N161E and N265Y and SAH.**

ITC thermograms (upper panels) and integrated heat plots (lower panels) for SAH titrations with wild-type PRMT1 and CARM1, and CARM1 mutants N161E and N265Y. The PRMT used for each titration is given above the relevant graph. Titrations were performed at 25°C with 200  $\mu\text{M}$  SAH and 35  $\mu\text{M}$  PRMT1. CARM1 concentrations ranged from 30–35  $\mu\text{M}$  and SAH concentrations from 150 – 264  $\mu\text{M}$ .

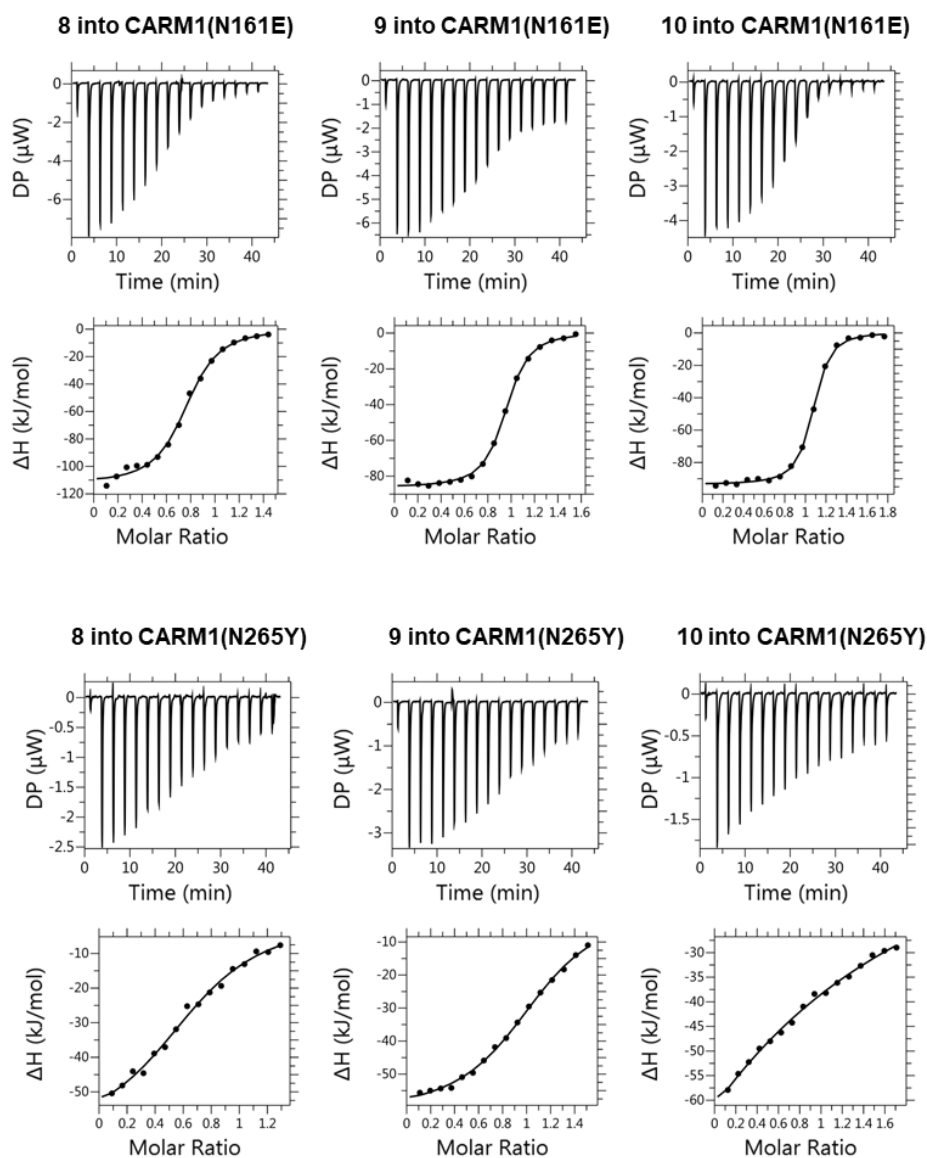

**Supplementary Figure S8. ITC thermograms (upper panels) and integrated heat plots (lower panels) for inhibitors 8, 9 and 10 with CARM1 mutants N265Y and N161E.**

The inhibitor and CARM1 mutant used for each titration are given above the relevant graphs. Titrations were performed at 25°C with CARM1 concentrations from 30 – 46  $\mu\text{M}$  and inhibitor concentrations from 219 – 320  $\mu\text{M}$ .

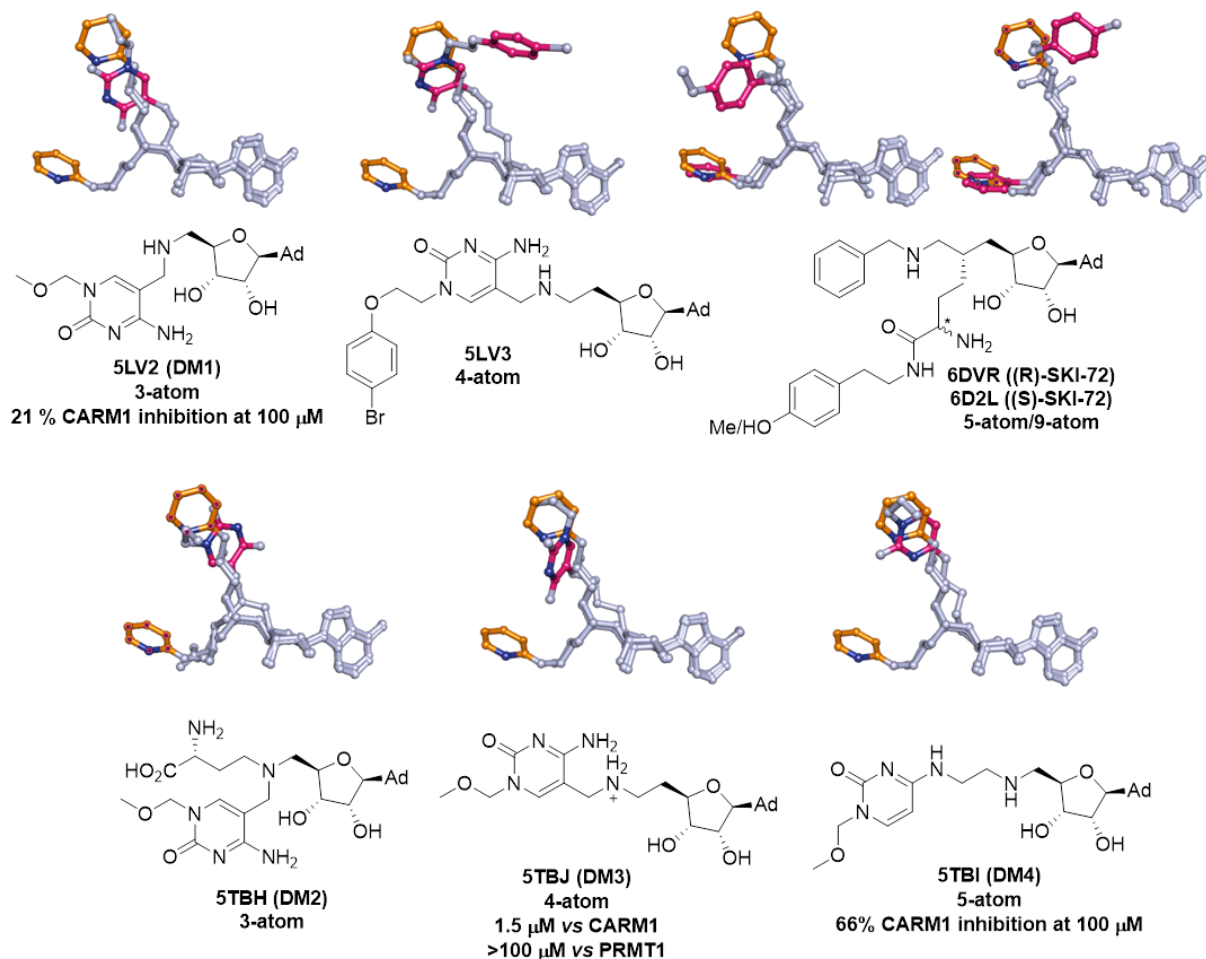

**Supplementary Figure S9. Superposition of CARM1-9 complex structure with aromatic bisubstrate inhibitors co-crystallised with CARM1 in the PDB.**

Ligands are shown in grey, with aromatic groups highlighted in orange (9) and hot pink (superposed inhibitors). Inhibitor structures, respective PDB codes and  $\text{IC}_{50}$  values (where available) are given underneath the relevant superposition. The number of atoms between the 4' adenosine carbon and the aromatic group are also indicated. The numbering of compounds DM1-DM4 is used herein and does not correspond to numbering used in the original paper.
